# Supplementary material
Source: PubMed Central journal article supplement (PMC548663)
Supplement: 7600558s1.pdf [file 7600558s1.pdf]

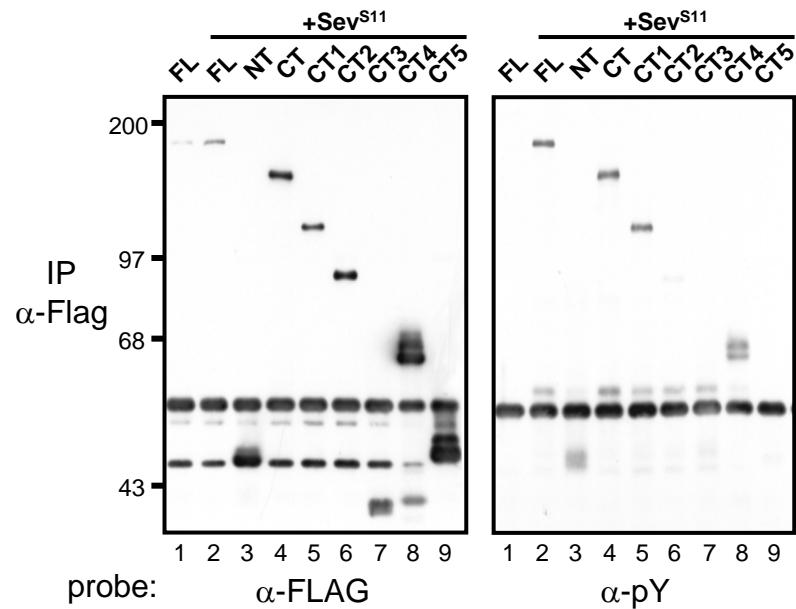

Supplemental Figure S1. Mapping of CNK Tyrosine Phosphorylation  
 CNK constructs shown in Figure 1B were transfected (3.5 – 7.5  $\mu$ g) in S2 cells and expressed for 72 hours. SEV<sup>S11</sup> expression was induced in lanes 2 to 9. Cells lysates were immunoprecipitated (IP) using  $\alpha$ -Flag. Total and tyrosine phosphorylation levels of the CNK variants were determined using  $\alpha$ -Flag (left panel) and  $\alpha$ -pY (right panel) antibodies, respectively.
