# Supplementary material
Source: PubMed Central journal article supplement (PMC548663)
Supplement: 7600558s2.pdf [file 7600558s2.pdf]

A

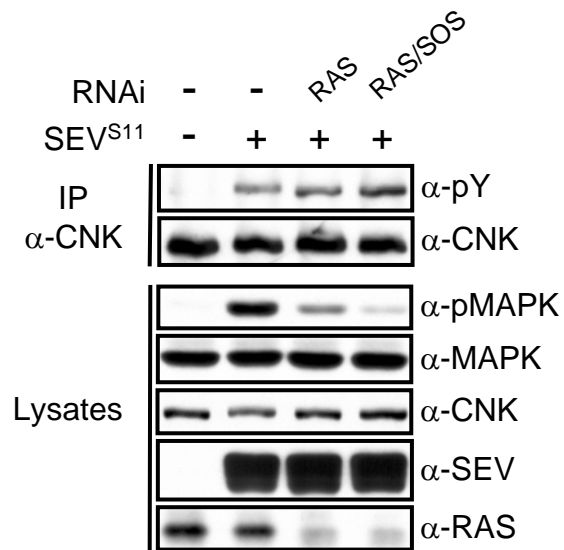

B

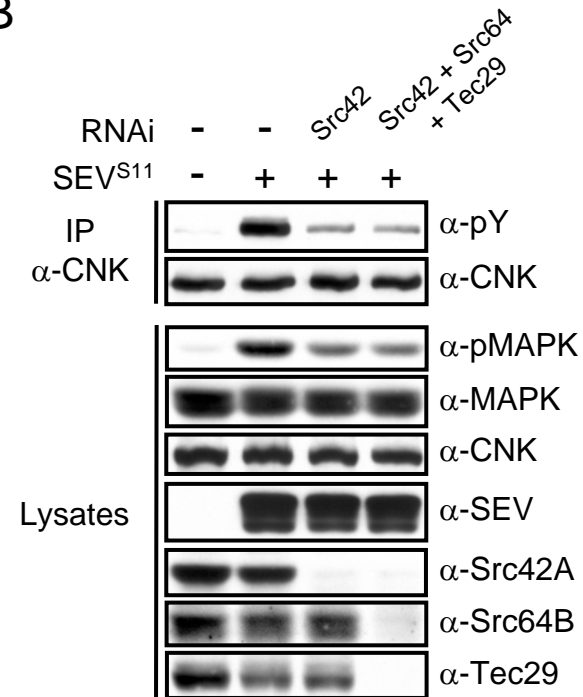

Supplemental Figure S2. SEV-induced tyrosine phosphorylation of CNK is RAS-, Src64- and Tec29-independent

(A and B) SEV<sup>S11</sup> stable cells were plated with or without the indicated dsRNAs (15 μg/ml) for four days prior to inducing SEV<sup>S11</sup> expression. Cell lysates or immunoprecipitated (IP) lysates were analyzed by immunoblots with the indicated antibodies.
