# Supplementary material
Source: PubMed Central journal article supplement (PMC548663)
Supplement: 7600558s3.pdf [file 7600558s3.pdf]

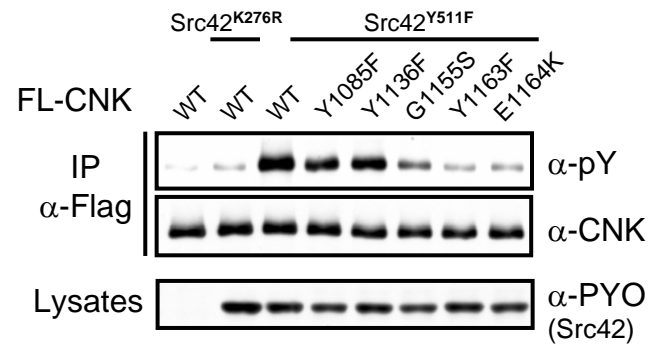

### Supplemental Figure S3. Src-mediated CNK Tyrosine Phosphorylation

S2 cells were transfected with the indicated combinations of Flag-tagged FL-CNK variants (0.5 – 0.7  $\mu\text{g}$ ), kinase-inactivated Src42<sup>K276R</sup> (0.35  $\mu\text{g}$ ) or constitutively activated Src42<sup>Y511F</sup> (0.5  $\mu\text{g}$ ). Expression of pyo-Src42 constructs were induced 2.5 hours prior to harvesting the cells. The CNK variants were expressed for a total of 36 hours under the control of the constitutive *cnk* promoter. WT denotes wild-type. Cell lysates were immunoprecipitated and analyzed using indicated antibodies.
