# Supplementary material
Source: PubMed Central journal article supplement (PMC548663)
Supplement: 7600558s5.pdf [file 7600558s5.pdf]

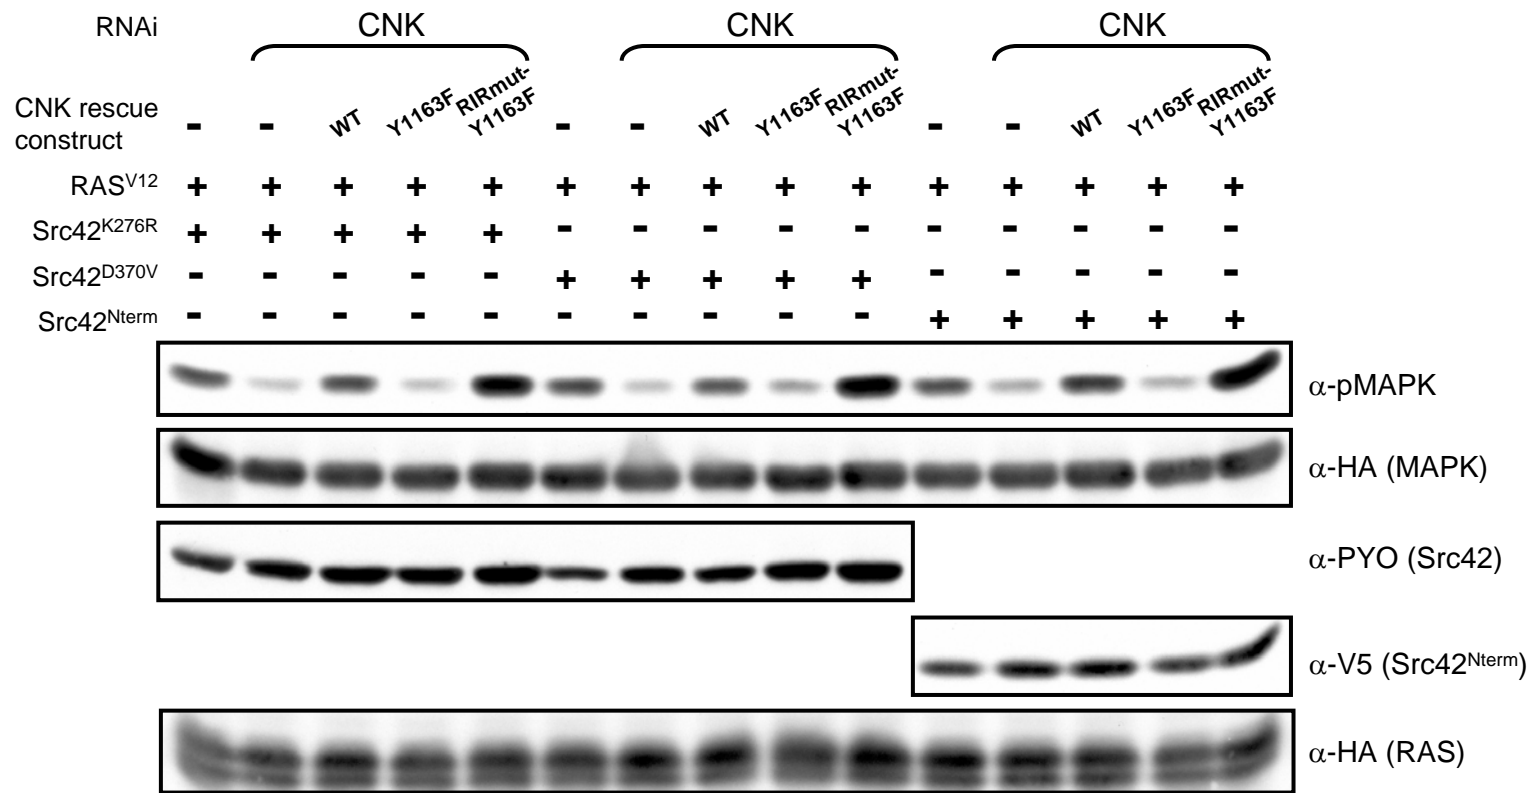

Supplemental Figure S5. Src42 Scaffolding Effect is Integrated by the Y1163 Residue of CNK  
 Cells were pre-plated with or without RNAi (10  $\mu$ g/ml) and then transfected 24 hours later with the indicated construct combinations: HA-MAPK (150 ng), HA-RAS<sup>V12</sup> (100 ng), PYO-Src42 variants (25 ng) and the CNK rescue constructs (10 ng). RAS and Src42 transgene expression was induced 48 hours post-transfection and cells were cultured for an additional 16 hours prior to harvest. Cell lysates were analyzed by immunoblots using the indicated antibodies.
