# Supplementary material
Source: PubMed Central journal article supplement (PMC548663)
Supplement: 7600558s6.pdf [file 7600558s6.pdf]

Supplementary Table I. *Src42*<sup>S-382</sup> and *Src42*<sup>S-527</sup> alleles suppress *raf*<sup>HM7</sup> and *raf*<sup>C110</sup> male hemizygous lethality

| ♂ \ ♀                                                                   | <i>raf</i> <sup>HM7</sup> / <i>FM6K</i> ; +/+ |                                | <i>raf</i> <sup>C110</sup> / <i>FM7</i> ; +/+ |                               |
|-------------------------------------------------------------------------|-----------------------------------------------|--------------------------------|-----------------------------------------------|-------------------------------|
|                                                                         | # of <i>raf</i> <sup>HM7</sup> males          | # of non-CyO <i>FM6K</i> males | # of <i>raf</i> <sup>C110</sup> males         | # of non-CyO <i>FM7</i> males |
| <i>w</i> <sup>-</sup> ; +/+                                             | 0                                             | 76                             | 0                                             | 34                            |
| <i>w</i> <sup>-</sup> ; <i>Src42</i> <sup>S-382</sup> / <i>Cyo</i>      | 29                                            | 36                             | 25                                            | 31                            |
| <i>w</i> <sup>-</sup> ; <i>Src42</i> <sup>S-527</sup> / <i>Cyo</i>      | 15                                            | 32                             | 14                                            | 11                            |
| <i>w</i> <sup>-</sup> ; <i>Src42</i> <sup>l(2)k10108</sup> / <i>Cyo</i> | 0                                             | 58                             | 0                                             | 25                            |

Male progeny distribution of a representative large-scale cross (15 males X 20 females) to demonstrate the ability of *Src42*<sup>S-382</sup> and *Src42*<sup>S-527</sup> alleles to suppress the lethality associated with two *raf* hypomorphic alleles, compared to a *bona fide Src42* loss-of-function allele (*Src42*<sup>l(2)k10108</sup>).
